# Supplementary material for: Andrographolide Induces ROS-Mediated Cytotoxicity, Lipid Peroxidation, and Compromised Cell Integrity in Saccharomyces cerevisiae
Source: MDPI journal article supplement (doi:10.3390/antiox12091765), 2023-09-14
Supplement: s1 [file s1]

## **Supplementary information**

### **Andrographolide induces ROS-mediated cytotoxicity, lipid peroxidation, and compromised cell integrity in *Saccharomyces cerevisiae***

**Tanaporn Phetruen<sup>1</sup>, Bloem van Dam<sup>1</sup>, Sittinan Chanarat<sup>1,\*</sup>**

<sup>1</sup>Laboratory of Molecular Cell Biology, Center for Excellence in Protein and Enzyme Technology, Faculty of Science, Mahidol University, Bangkok, Thailand

\*Correspondence: [sittinan.cha@mahidol.edu](mailto:sittinan.cha@mahidol.edu)

**Table S1. Strains used in this study**

| Strain            | Genotype                                                                | Reference  |
|-------------------|-------------------------------------------------------------------------|------------|
| W303 wild-type    | <i>MATa ho ade2-1 his3-11, 15 leu2-3, 112 ura3 trp1-1 ssd1 can1-100</i> | K. Nasmyth |
| <i>sod2Δ</i>      | W303 <i>sod2Δ::kanMX6</i>                                               | This study |
| <i>css1Δ</i>      | W303 <i>css1Δ::kanMX6</i>                                               | This study |
| <i>vma4Δ</i>      | W303 <i>vma4Δ::kanMX6</i>                                               | This study |
| <i>vma9Δ</i>      | W303 <i>vma9Δ::kanMX6</i>                                               | This study |
| <i>erg6Δ</i>      | W303 <i>erg6Δ::kanMX6</i>                                               | This study |
| sGFP-VRG4         | W303 sGFP-VRG4                                                          | This study |
| SEC7-mCherry2Bx6  | W303 SEC7-mCherry2Bx6                                                   | This study |
| VPS8- mCherry2Bx6 | W303 VPS8- mCherry2Bx6                                                  | This study |
| ERG11-iGFPx3      | W303 ERG11-iGFPx3                                                       | This study |

**Table S2. Plasmids used in this study**

| Plasmid                    | Description                                                                           | Reference                |
|----------------------------|---------------------------------------------------------------------------------------|--------------------------|
| YIplac211-sGFP-VRG4        | Integration plasmid used for fluorescence visualization of early Golgi                | (Casler and Glick, 2020) |
| YIplac211-SEC7-mCherry2Bx6 | Integration plasmid used for fluorescence visualization of late Golgi                 | (Casler and Glick, 2020) |
| YIplac211-VPS8-mCherry2Bx6 | Integration plasmid used for fluorescence visualization of prevacuolar endosome (PVE) | (Casler and Glick, 2020) |
| YIplac211-ERG11-iGFPx3     | Integration plasmid used for fluorescence visualization of endoplasmic reticulum      | (Casler and Glick, 2020) |

**Table S3. Primers used in this study**

| <b>Primer</b>  | <b>Sequence (5'→3')</b>                                                       |
|----------------|-------------------------------------------------------------------------------|
| <i>SOD2-S1</i> | GGAACGAAACCCCAATTGATAACTATACCTCCTAAAAACGTACCAGGATGC<br>GTACGCTGCAGGTCGAC      |
| <i>SOD2-S2</i> | AAAAACGACACAGTGGAAAAAAAAAAGGTATTTTCTTTCTTTCTTTCTTCAAT<br>CGATGAATTCGAGCTCG    |
| <i>CCS1-S1</i> | GCACAAAAATGACCACGAACGATACATACGAGGCTACTTATGCCATTCCCA<br>TGCGTACGCTGCAGGTCGAC   |
| <i>CCS1-S2</i> | CTATATTATGTTATATCTGTATTACGCTACGTTGTGCTATCTTGGATGTTCTAA<br>TCGATGAATTCGAGCTCG  |
| <i>VMA4-S1</i> | ACTGTTTTACAAAAGAGGCACAGAACAGGCCACGCACCATCCGATACAGC<br>ATGCGTACGCTGCAGGTCGAC   |
| <i>VMA4-S2</i> | TCTGTTAGGAGTGTATATGTAAGTATGTAGGTATACAAGCTGCTGGTTCGATC<br>AATCGATGAATTCGAGCTCG |
| <i>VMA9-S1</i> | TATTCTGCAAATTCAGGTCTCAAATCTGAACGGCGTGGAGCCACCAAGGG<br>ATGCGTACGCTGCAGGTCGAC   |
| <i>VMA9-S2</i> | TTTTATTCTCGCTCTGTGAAAAAAGACTACTACATTTTTTTGACCTTTTATCTA<br>ATCGATGAATTCGAGCTCG |
| <i>ERG6-S1</i> | AATTTAAAAAACAAGAATAAAATAATAATATAGTAGGCAGCATAAGATGCGT<br>ACGCTGCAGGTCGAC       |
| <i>ERG6-S2</i> | TAGGTATATATCGTGCGCTTTATTTGAATCTTATTGATCTAGTGAATTTAATCG<br>ATGAATTCGAGCTCG     |
| <i>HAC1-F</i>  | CGCAATCGAACTTGGCTATCCCTACC                                                    |
| <i>HAC1-R</i>  | CCCACCAACAGCGATAATAACGAG                                                      |

Figure S1

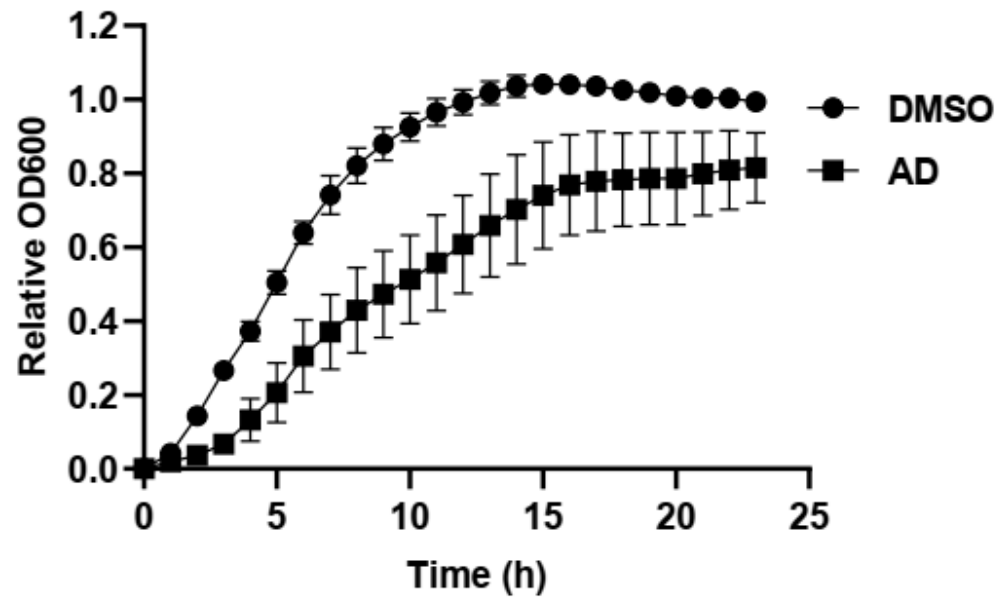

**Supplementary Figure S1. Andrographolide exhibits cytotoxicity in *S. cerevisiae* with ROS synergy.** Similar to Figure 1A, but wild-type yeast cells were grown in synthetic minimal media supplemented with 2% glucose.

**Figure S2**

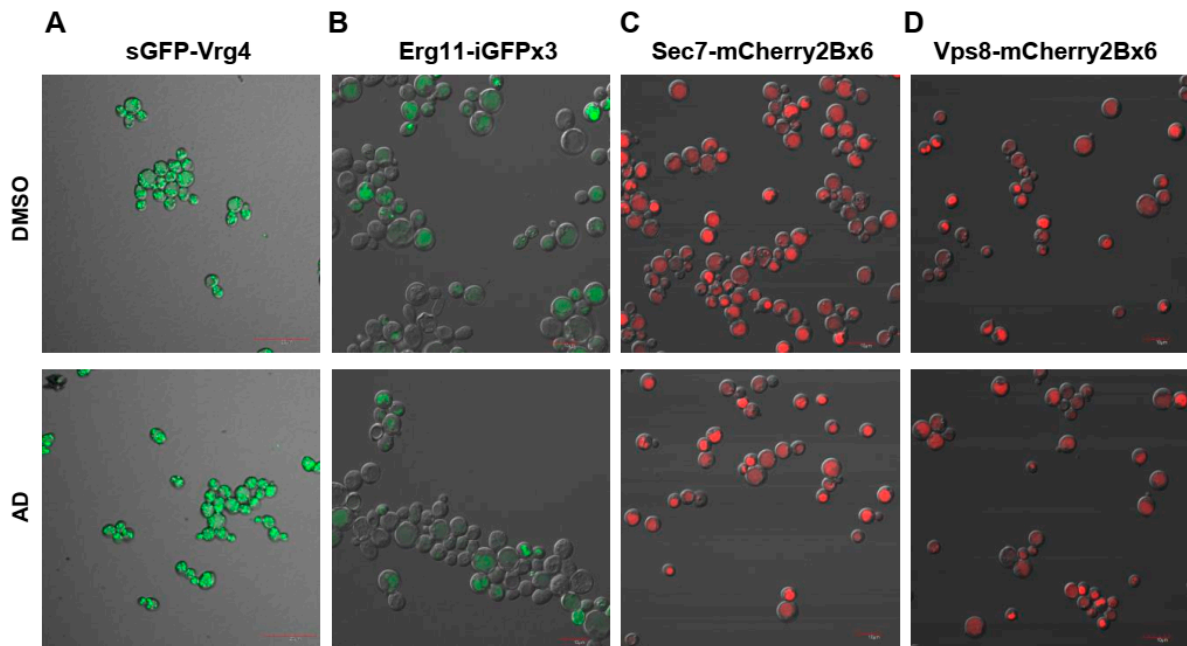

**Supplementary Figure S2. No significant change in morphological abnormalities of organelles was observed in cells treated with andrographolide. (A) – (D)** Fluorescence micrograph of cells expressing sGFP-Vrg4, Sec7-mCherry2Bx6, Vps8-mCherry2Bx6, and Erg11-iGFPx3, respectively. Cells were treated with or without andrographolide. DMSO serves as solvent control. Scale bar, 10  $\mu$ m.

**Figure S3**

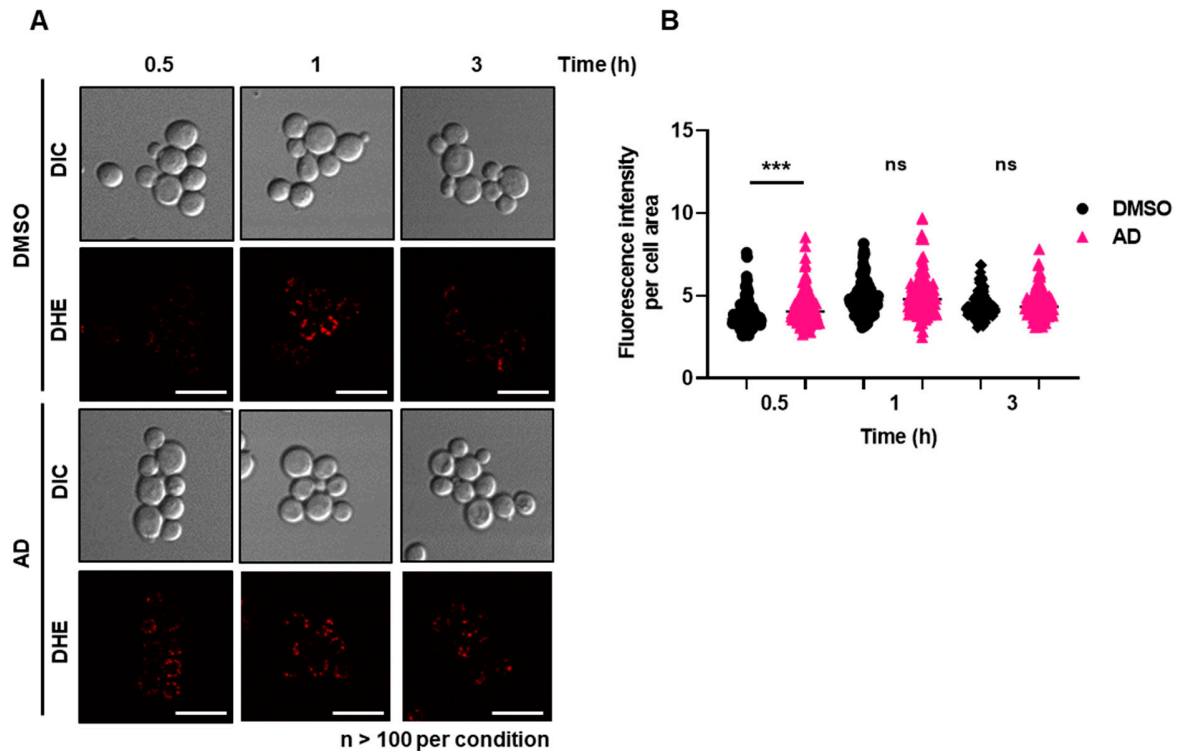

**Supplementary Figure S3. Levels of superoxide remained unchanged upon andrographolide treatment.** (A) DMSO- or andrographolide-treated cells were assayed with DHE for quantification of superoxide levels in cells. Scale bar, 10  $\mu$ m. (B) Quantification of Figure S3A. Each dot represents fluorescence intensity per cell area measured by ImageJ. Statistical significance was calculated using two-tailed unpaired t-test with Mann-Whitney test (\*\*\*,  $p < 0.001$ ; ns, not significant).

**Figure S4**

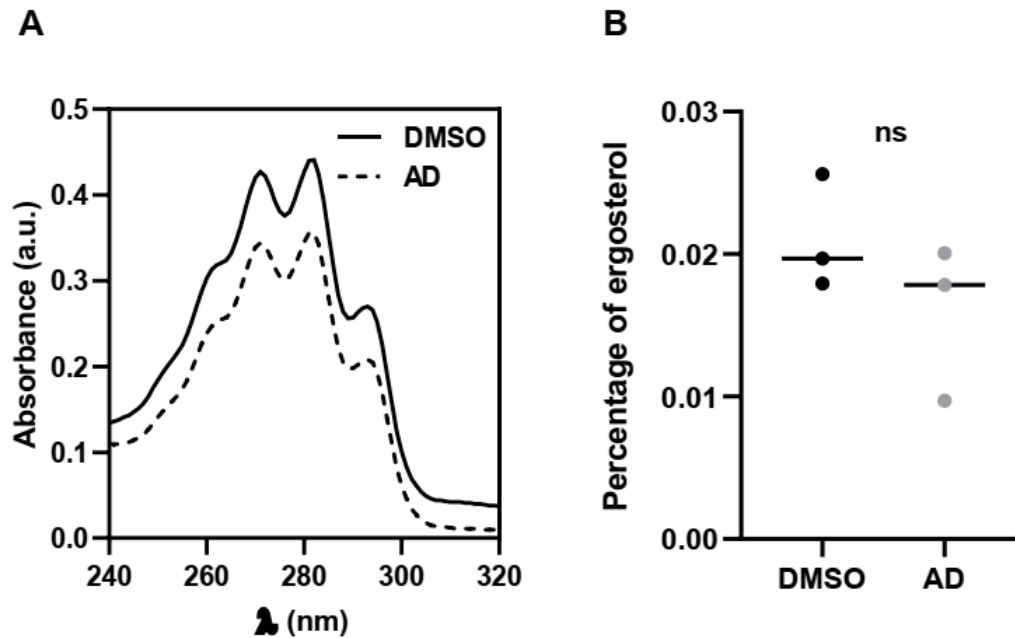

**Supplementary Figure S4. Levels of ergosterol remained unchanged upon andrographolide treatment.** (A) Sterols were extracted from the cells treated with or without andrographolide and spectrophotometrically scanned from 240 to 320 nm. The characteristic four peaks of sterols were shown. (B) Ergosterol contents were calculated from values obtained from Figure S4A and plotted. Each dot represents the percentage of ergosterol from three biological replicates. Statistical analysis was carried out using a two-tailed unpaired t-test with Mann-Whitney test (ns, not significant).

Figure S5

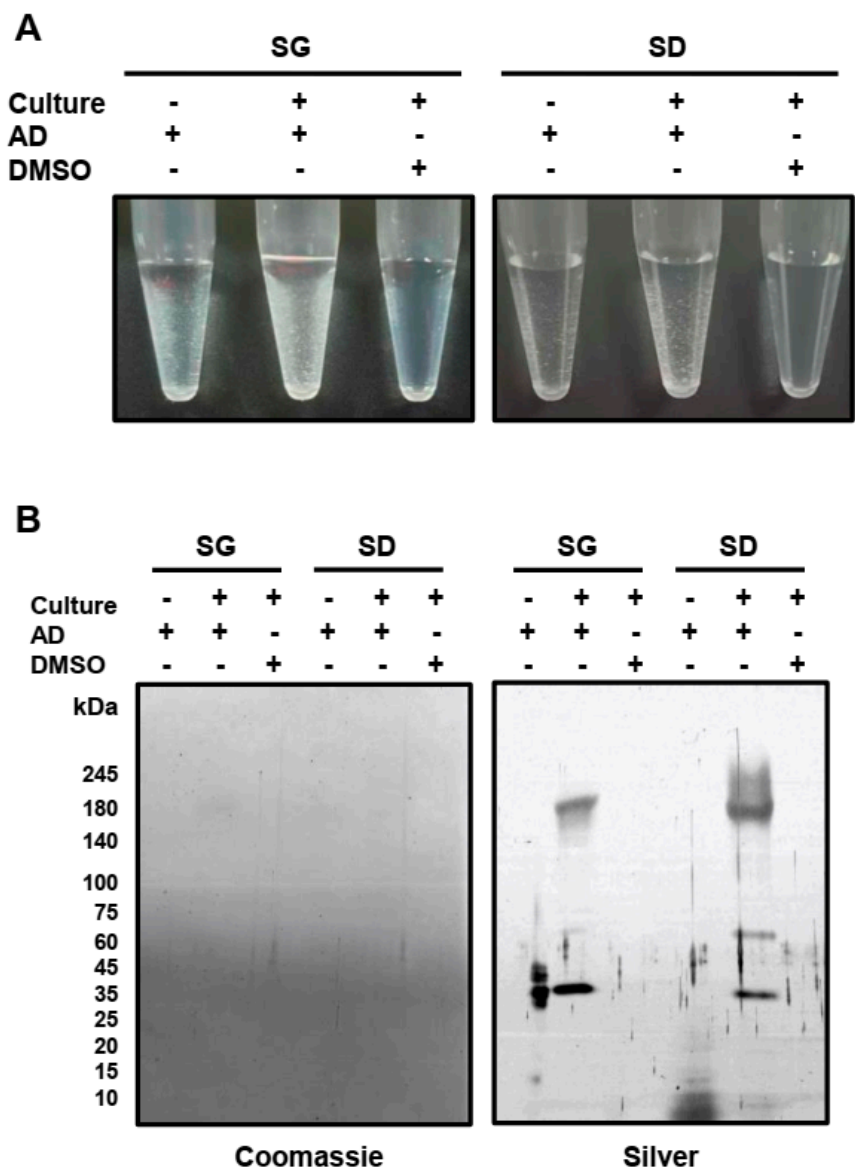

**Supplementary Figure S5. Andrographolide increases precipitation in cultured media.** (A) The precipitation in SG and SD media from the experiment shown in Figure 6B. (B) The pellets were resuspended in 2x SDS-PAGE loading buffer and subjected to SDS gel electrophoresis followed by Coomassie blue and silver staining.



### **Supplementary reference**

Casler, J.C., and Glick, B.S. (2020). A microscopy-based kinetic analysis of yeast vacuolar protein sorting. *Elife* 9.
